# Supplementary material for: Oncolytic adenovirus encoding apolipoprotein A1 suppresses metastasis of triple-negative breast cancer in mice
Source: PubMed Central journal article supplement (PMC10988920; doi:10.1186/s13046-024-03011-0), 2024-04-03
Supplement: 13046_2024_3011_MOESM1_ESM.pdf [file 13046_2024_3011_MOESM1_ESM.pdf]

## Supplementary information

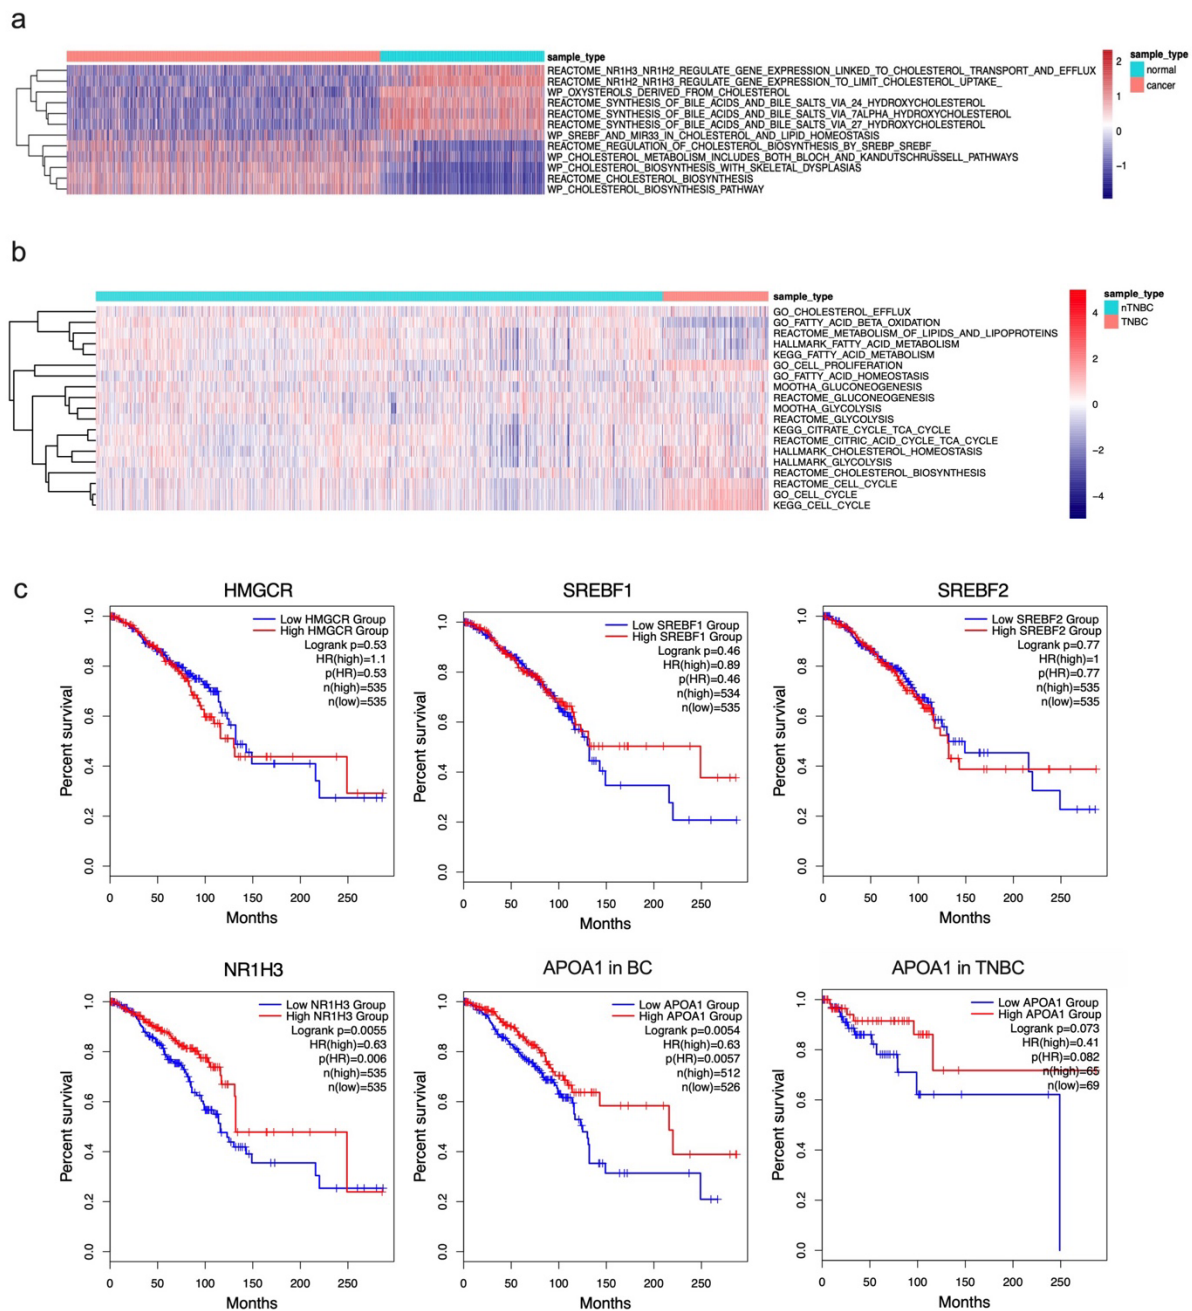

**Figure S1, Single-sample gene set enrichment analysis (ssGSEA) of cholesterol metabolism pathways and the association between cholesterol biosynthesis/efflux genes and patient survival in breast cancer patients.** a) Enrichment of indicated pathways with data normalized from -2 (Blue) to 2 (Red) in BRCA cancers (n=1092, data from TCGA) and normal breast tissue (n=572, data form TCGA and GTEx). b) Enrichment of indicated pathways with data normalized from -4 (Blue) to 4 (Red) in triple-negative breast cancers (TNBC, n=299) and non-triple-negative breast cancers (nTNBC, n=1605). The gene expression data were obtained from cBioPortal. c) Correlation between cholesterol biosynthesis/efflux genes and survival of the

breast cancer patients using the Gene Expression Profiling Interactive Analysis (GEPIA) online tool (<http://gepia.cancer-pku.cn>).

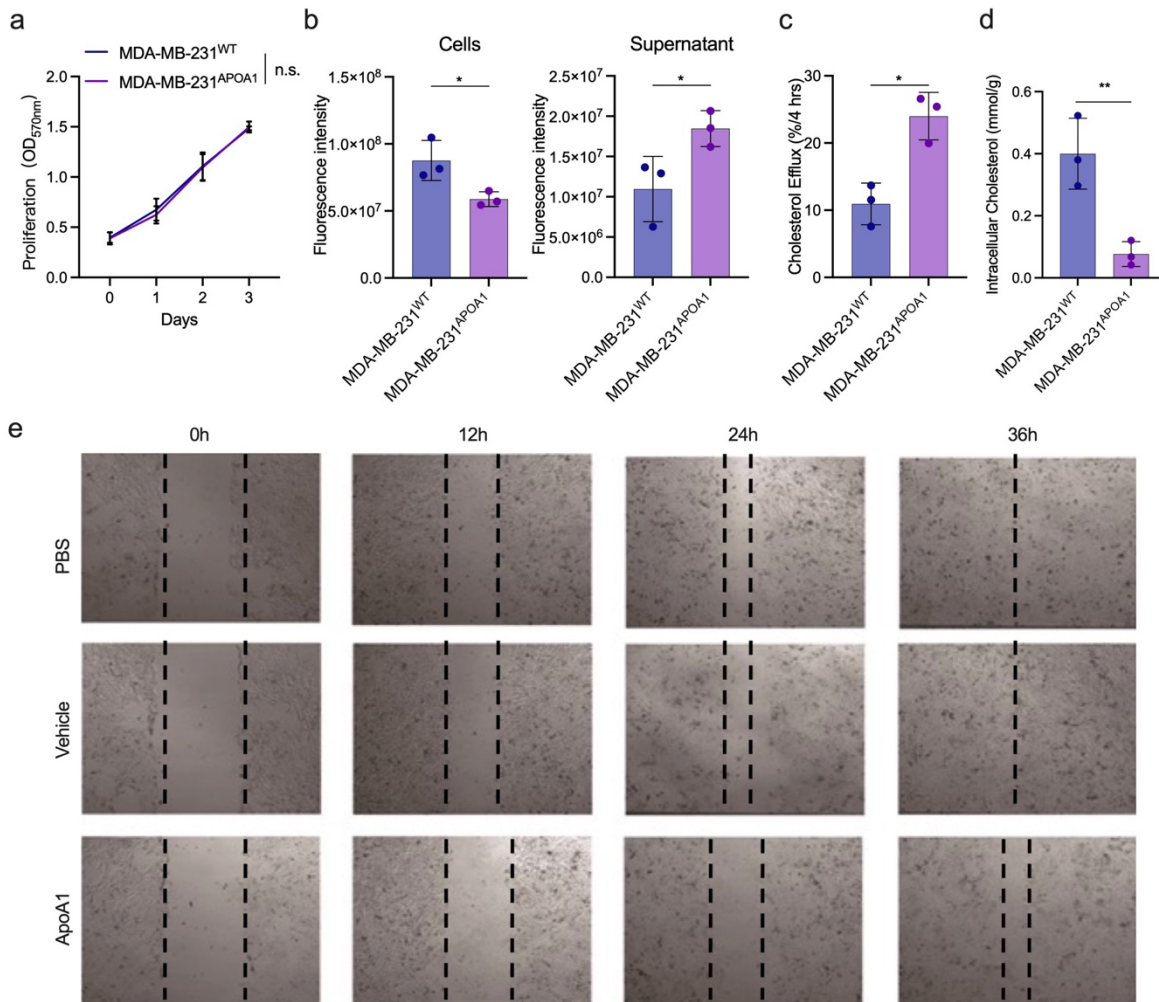

**Figure S2 ApoA1 promote cholesterol efflux and inhibits migration in MDA-MB-231 cells.** A stable MDA-MB-231 cell line overexpressing ApoA1, MDA-MB-231<sup>ApoA1</sup>, was generated through lentivirus infection. Proliferation of MDA-MB-231<sup>ApoA1</sup> and the parental cell line MDA-MB-231<sup>WT</sup> was determined using MTT assay. b) and c) Cholesterol efflux was measured using a cholesterol efflux assay kit. d) Intracellular cholesterol levels were measured using spectrophotometric tests. e) Migration of MDA-MB-231 cells transfected with either ApoA1 expressing plasmid (pApoA1) or control plasmid (vehicle) was tested using wound healing assays. ns: no significant different; \*p < 0.05; \*\*p < 0.01.

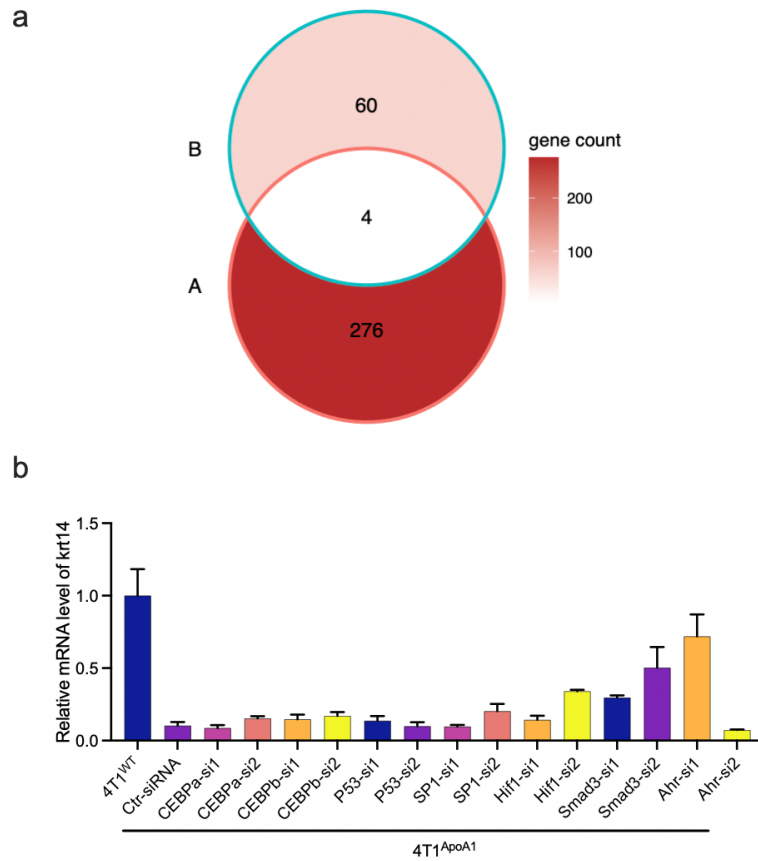

**Figure S3 Screening for transcription factors involved in ApoA1 down-regulation of KRT14 transcription.** a) Venn plot of intersection of two gene lists: one predicting transcription factors that may bind to KRT14 (60), and the other identifying suppressive transcription factors with differing expression between 4T1ApoA1 and 4T1WT (276). Four gene including FOXO3A, hypoxia-inducible factor-1 (HIF-1), SMAD Family Member 3 (SMAD3), and Aryl Hydrocarbon Receptor (Ahr) were screened out. b) Gene knockdown assay was used to determine the transcription factors involved in ApoA1 down-regulation of KRT14 transcription. 4T1ApoA1 cells were transfected with the indicated siRNAs for 48 hours. mRNA levels of KRT14 were determined by a qPCR assay.

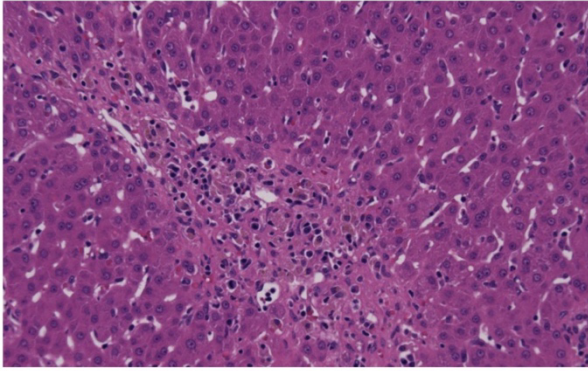

Liver

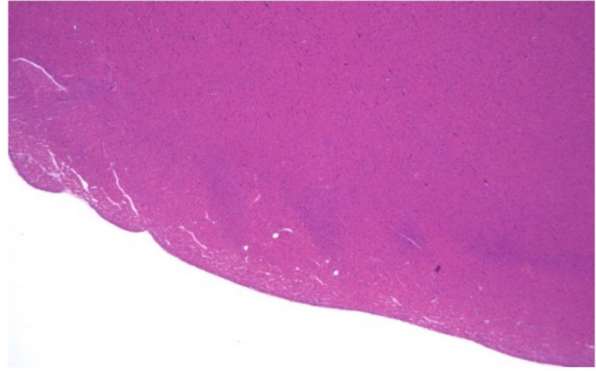

Heart

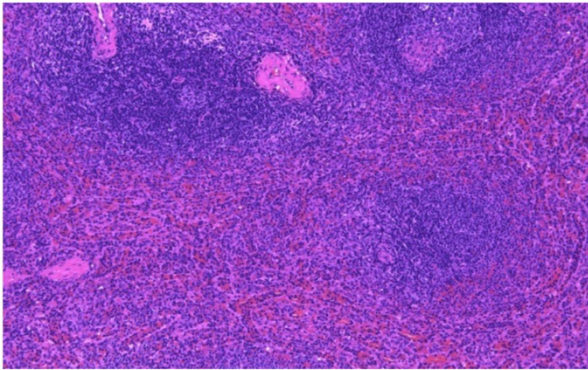

Spleen

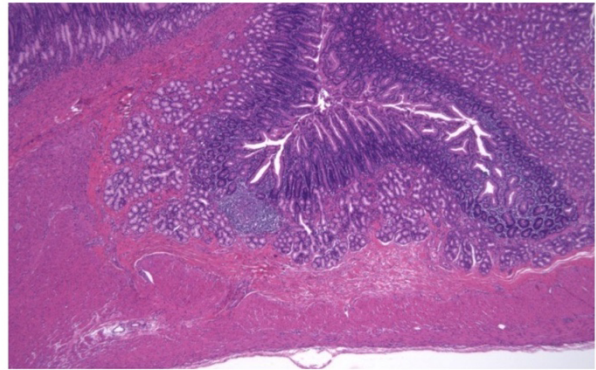

Stomach

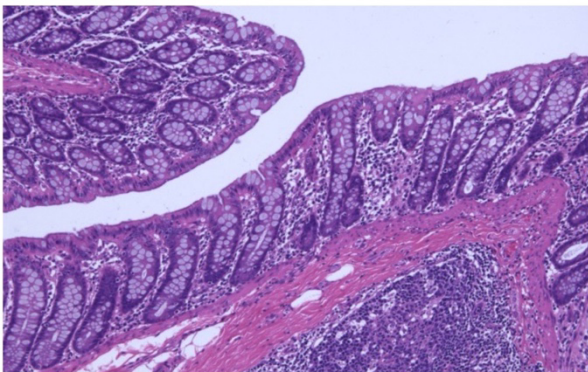

Rectum

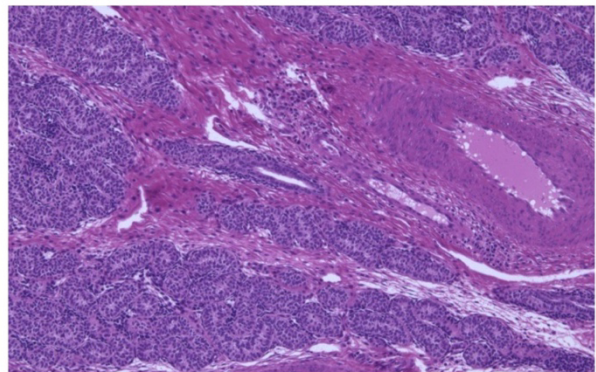

Testis

**Figure S4 Safety assessment subcutaneous injection of ADV-ApoA1 in Rhesus monkeys.** Rhesus monkeys were injected subcutaneously with ADV-ApoA1 ( $1.5 \times 10^{12}$  VP/kg) six times. Tissues were collected 24 hours after the last injection for H&E staining to assess toxicity.

**Table S1** Primers for quantitative real-time PCR (qPCR).

| <b>Gene</b>          | <b>5' forward primer</b> | <b>3' reverse primer</b> |
|----------------------|--------------------------|--------------------------|
| Mouse FOXO3a         | GAGCTGGAGCTCGAACCTT      | TCCTCGGGGATCATGGAGTC     |
| Mouse KRT14          | CAGAGCGGCAAGAGTGAGAT     | GGAAGATGAAAGGTGGGCGT     |
| Mouse ABCA1          | CCTCAGCCATGACCTGCCTTGTAG | CCGAGGAAGACGTGGACACCTTC  |
| Mouse Vimentin       | TGAGATCGCCACCTACAGGA     | TTGCGCTCCTGAAAACTGC      |
| Mouse Slug           | CATCCTTGGGGCGTGTAAGT     | ATGGCATGGGGGTCTGAAAG     |
| Mouse Zeb1           | TCCGGCTCCTACTCTCAACA     | GCTCCAACCTCCACTGTACC     |
| Mouse SNAIL          | ATGGAGTGCCTTTGTACCCG     | CAGTAACCACCCTGCTGAGG     |
| Mouse $\beta$ -actin | GTACCACCATGTACCCAGGC     | AACGCAGCTCAGTAACAGTCC    |
| Mouse GAPDH          | TCTCCTGCGACTTCAACA       | TGTAGCCGTATTCATTGTCA     |
| E1A                  | CCGAAGATCCCAACGAGGAG     | TTGGCATAGAAACCGGACCC     |
| Human ABCA1          | GTTAGGAAACCTGCTGCCCT     | ATGCCACACACAGGACGTAG     |
| Human $\beta$ -actin | TGGCACCCAGCACAATGAAG     | CTGTCACCTTCACCGTTCCA     |

**Table S2** siRNA for gene knock-down

| Gene     | Sense strand (5'-3')      | Antisense strand (5'-3')  |
|----------|---------------------------|---------------------------|
| FOXO3a-1 | GCUCUUGGUGGAUCAUCAATT     | UUGAUGAUCCACCAAGAGCTT     |
| FOXO3a-2 | GCCAGUCUAUGCAAACCCUTT     | AGGGUUUGCAUAGACUGGCTT     |
| Ahr-1    | GCAACUAGAGCAACAGCAATT     | UUGCUGUUGCUCUAGUUGCTT     |
| Ahr-2    | GCAAAUCAACGGCACGUUUTT     | AAACGUGCCGUUGAUUUGCTT     |
| Smad3-1  | ACGCAGAACGUGAACACCAAGUGCA | UGCACUUGGUGUUCACGUUCUGCGU |
| Smad3-2  | CAUGAAGAAGGAUGAAGUGUGUGUA | UACACACACUUCAUCCUUCUUCAUG |
| Hlf1-1   | CCUUCAUCCUGAAGACGCAUUUAGU | ACUAAAUGCGUCUUCAGGAUGAAGG |
| Hlf1-2   | ACGGAGAUACUUUCCAGCUGGAAUA | UAUUCCAGCUGGAAAGUAUCUCCGU |
| p53-1    | GACCUAUCCUUACCAUCAUTT     | AUGAUGGUAAGGAUAGGUCTT     |
| p53-2    | CCACUUGAUGGAGAGUAUUTT     | AAUACUCUCCAUCAAGUGGTT     |
| Sp1-1    | CCAGCAACAUGGGAAUUAUTT     | AUAAUUCCCAUGGUUGCUGGTT    |
| Sp1-2    | GCGGCAAAGUAUAUGGCAATT     | UUGCCAUAUACUUUGCCGCTT     |
| Cebpa-1  | GCGCAAGAGCCGAGAUAAATT     | UUUAUCUCGGCUCUUGCGCTT     |
| Cebpa-2  | GGAGUUGACCAGUGACAAUTT     | AUUGUCACUGGUCAACUCCTT     |
| Cebpb-1  | AGGCCAAGAUGCGCAACCTT      | AGGUUGCGCAUCUUGGCCUTT     |
| Cebpb-2  | GGAACUUGUUCAAGCAGCUTT     | AGCUGCUUGAACAAAGUUCCTT    |
| ABCA1 -1 | GUGUCUACGUGCAACAGAUTT     | AUCUGUUGCACGUAGACACTT     |
| ABCA1 -2 | CUAGCCUGCUGUCUCCUGUGGC    | GCCACAGGAGACAGCAGGCUAG    |
